# Supplementary material for: Sujiaonori-Derived Algal Biomaterials Inhibit Allergic Reaction in Allergen-Sensitized RBL-2H3 Cell Line and Improve Skin Health in Humans
Source: MDPI journal article supplement (doi:10.3390/jfb8030037), 2017-08-29
Supplement: s1 [file s1]

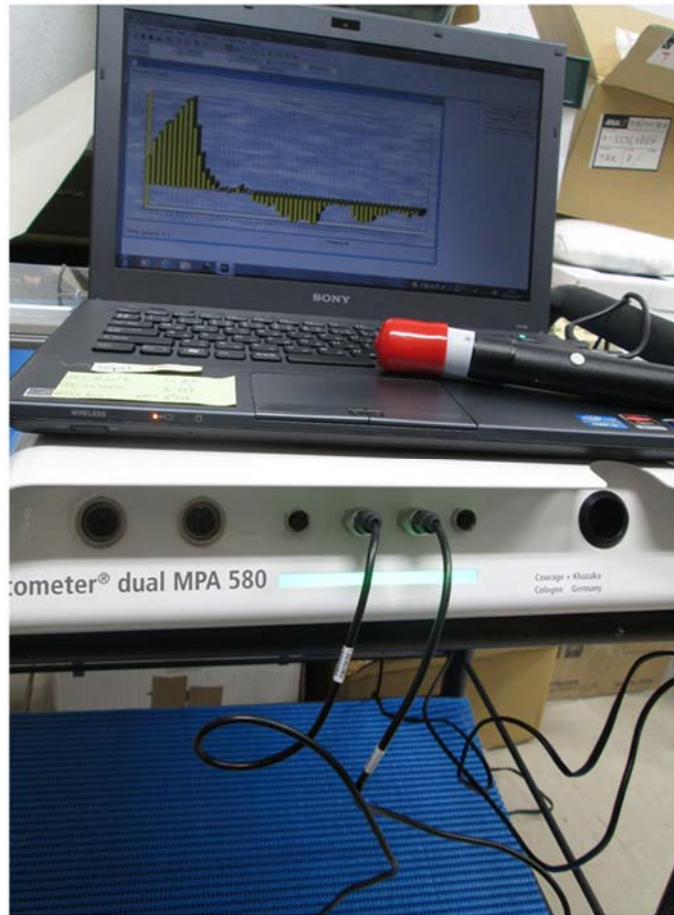

**Supplementary Figure 1.** Cutometer Dual MPA 580 for TEWL measurement.
